# Supplementary material for: A careful scrutiny of the aromaticity in anionic polynitrogen clusters
Source: Royal Society of Chemistry journal article supplement (doi:10.1039/d5cp01974e), 2025-01-01
Supplement: d5cp01974e1.pdf [file d5cp01974e1.pdf]

**Manuscript ID: CP-ART-02-2025-000541**

**A careful scrutiny of the aromaticity in anionic polynitrogen clusters**

Gourhari Jana,<sup>1,\*</sup> and Pratim K. Chattaraj<sup>2,\*</sup>

<sup>1</sup>*School of Chemical Sciences, Indian Association for the Cultivation of Science, Jadavpur, Kolkata 700032, India*

<sup>2</sup>*Department of Chemistry, Birla Institute of Technology, Mesra, Ranchi 835215, Jharkhand, India*

\* Corresponding authors: [scsgj3093@iacs.res.in](mailto:scsgj3093@iacs.res.in) (GJ) (0000-0001-7864-8489),  
[pkc@chem.iitkgp.ac.in](mailto:pkc@chem.iitkgp.ac.in) (PKC) (ORCID; 0000-0002-5650-7666)

**Supplementary material**

To provide a broader perspective on the role of charge in influencing aromaticity, we have included a new section in the Supporting Information where the neutral N<sub>4</sub> and N<sub>6</sub> clusters are analyzed using the same computational protocol applied to their anionic counterparts. The key findings are briefly discussed in the main text to emphasize the impact of electron addition on aromatic character. This comparative analysis enhances the overall context of our study by illustrating how excess electrons can induce or modulate delocalization and aromatic stabilization in polynitrogen systems.

**Clarification of  $\sigma$ - and  $\pi$ -Electron Contributions:**

We have discussed on the number and nature of  $\sigma$ - and  $\pi$ -electrons involved in the aromatic character of N<sub>4</sub><sup>2-</sup> and N<sub>6</sub><sup>4-</sup>:

**N<sub>4</sub><sup>2-</sup> Cluster:**

**Electron Count:** Each nitrogen atom has one p-orbital perpendicular to the plane (similar to carbon in benzene). 4 atoms  $\times$  1 electron per N = 4  $\pi$ -electrons. Additional -2 charge  $\Rightarrow$  adds 2 electrons: 6  $\pi$ -electrons total.

**Hückel Rule Check:** Hückel's rule for aromaticity =  $4n + 2$  (where  $n = 0, 1, 2, \dots$ ). 6  $\pi$ -electrons =  $4(1) + 2 \rightarrow$  satisfies Hückel's rule.

Thus, the  $\pi$ -system is aromatic.

**Electron Behavior:** Sigma framework (N–N bonds) typically maintains normal bonding. However, the NICS(0) (at ring center) for  $\sigma$  contribution shows positive or less negative values, suggesting  $\sigma$ -antiaromaticity.

**Reason:** The in-plane orbitals form a conjugated  $\sigma$ -network which, in some strained small systems (like 4-membered rings), can become antiaromatic.

Thus, the  $N_4^{2-}$   $\sigma$ -system is antiaromatic.

**Global Aromaticity (Conflict between  $\pi$  and  $\sigma$  effects - Conflicting aromaticity):**  $N_4^{2-}$  is not globally aromatic. Instead, the overall stability and aromatic behavior mainly arise from the dominant  $\pi$ -aromaticity, but weakened by  $\sigma$ -antiaromaticity.

#### $N_6^{4-}$ Cluster:

**Electron Count:** 6 atoms  $\times$  1 p-electron each = 6. Additional - 4 from charge = 10  $\pi$ -electrons.

**Hückel Rule Check:** 10  $\pi$ -electrons =  $4(2) + 2 \rightarrow n = 2 \rightarrow$  satisfies Hückel's rule.

Thus, the  $\pi$ -system should be aromatic.

**Electron Behavior:** More ring members  $\rightarrow$  more strain relief compared to 4-membered rings. Still, NICS(0)  $\sigma$ -contribution shows slightly positive or weakly negative values, slight  $\sigma$ -antiaromaticity or almost neutral.

**Reason:** 6-membered rings (like benzene) have strong  $\sigma$ -stabilization. But in  $N_6^{4-}$ , due to lone-pair interactions and charge localization, perfect delocalization is disrupted  $\rightarrow$  slight  $\sigma$ -antiaromatic behavior.

Thus, the  $\sigma$ -system is slightly antiaromatic or close to non-aromatic.

#### **Global Aromaticity:**

**Dominated by  $\pi$ -effects:** Strong  $\pi$ -aromaticity (supported by large negative NICS(0) and NICS(1)). Sigma system contributes minimally.

**Result:**  $\pi$ -dominated global aromaticity — the cluster behaves globally aromatic, but not as perfect as benzene.

**Table S1. Summary Table**

| Cluster    | Pi-System | Sigma-System                     | Global Aromaticity             |
|------------|-----------|----------------------------------|--------------------------------|
| $N_4^{2-}$ | Aromatic  | Antiaromatic                     | Conflicting ( $\pi$ dominates) |
| $N_6^{4-}$ | Aromatic  | Slightly antiaromatic or neutral | Globally $\pi$ -aromatic       |

#### **Comparative Aromaticity Analysis of Neutral $N_4$ and $N_6$ Clusters**

To investigate the influence of electron count on aromaticity in polynitrogen systems, we performed an analogous computational analysis of the neutral  $N_4$  and  $N_6$  clusters using the

same protocol as for the anionic species. Key aromaticity indices including NICS(0), NICS<sub>zz</sub>(1), and ELF<sub>π</sub> were evaluated at optimized geometries obtained at the B3LYP/6-311G(d,p) level of theory.

**Table S2:** Comparison of aromaticity indicators for neutral and anionic N<sub>4</sub> and N<sub>6</sub> clusters

| Cluster                      | NICS (0 Å) | NICS <sub>zz</sub> (0 Å) | ELF <sub>σ</sub> | ELF <sub>π</sub> | Global Aromaticity Index | LOLIPOP |
|------------------------------|------------|--------------------------|------------------|------------------|--------------------------|---------|
| N <sub>4</sub>               | 3.25       | 42.10                    | 0.603            | 0.524            | 0.564                    | 1.210   |
| N <sub>4</sub> <sup>2-</sup> | 5.64       | 78.28                    | 0.786            | 0.489            | 0.638                    | 1.533   |
| N <sub>6</sub>               | 1.88       | 21.77                    | 0.611            | 0.546            | 0.578                    | 1.340   |
| N <sub>6</sub> <sup>4-</sup> | -9.84      | 1.55                     | 0.841            | 0.323            | 0.582                    | 2.170   |

#### Neutral N<sub>4</sub> and N<sub>6</sub> Clusters:

- N<sub>4</sub>: The positive NICS (0 Å) value of 3.25 ppm and a high NICS<sub>zz</sub> (0 Å) value of 42.10 ppm suggest a lack of aromatic character, indicating possible antiaromaticity. The ELF<sub>σ</sub> and ELF<sub>π</sub> values (0.603 and 0.524, respectively) imply moderate electron localization, and the global aromaticity index of 0.564 supports a non-aromatic or weakly antiaromatic nature. The LOLIPOP value of 1.210 further corroborates this assessment.
- N<sub>6</sub>: With a NICS (0 Å) value of 1.88 ppm and NICS<sub>zz</sub> (0 Å) of 21.77 ppm, N<sub>6</sub> exhibits minimal aromatic character. The ELF<sub>σ</sub> and ELF<sub>π</sub> values (0.611 and 0.546) indicate slightly better electron delocalization compared to N<sub>4</sub>, and the global aromaticity index of 0.578 suggests a borderline non-aromatic character. The LOLIPOP value of 1.340 aligns with this interpretation.

#### Anionic N<sub>4</sub><sup>2-</sup> and N<sub>6</sub><sup>4-</sup> Clusters:

- N<sub>4</sub><sup>2-</sup>: The NICS (0 Å) value increases to 5.64 ppm, and NICS<sub>zz</sub> (0 Å) rises to 78.28 ppm, indicating enhanced antiaromaticity upon electron addition. However, the ELF<sub>σ</sub> value increases to 0.786, suggesting improved σ-electron delocalization, while the ELF<sub>π</sub> value decreases to 0.489, indicating reduced π-delocalization. The global aromaticity index of 0.638 and LOLIPOP value of 1.533 reflect a complex interplay between σ and π contributions, leading to a nuanced aromatic character.
- N<sub>6</sub><sup>4-</sup>: The NICS (0 Å) value becomes negative at -9.84 ppm, and NICS<sub>zz</sub> (0 Å) drops to 1.55 ppm, signifying the development of aromatic character. The ELF<sub>σ</sub> value increases

to 0.841, indicating strong  $\sigma$ -delocalization, while the  $ELF_{\pi}$  value decreases to 0.323, suggesting diminished  $\pi$ -delocalization. The global aromaticity index of 0.582 and a higher LOLIPOP value of 2.170 suggest that the aromatic character in  $N_6^{4-}$  is predominantly driven by  $\sigma$ -electron delocalization.

The analysis reveals that electron addition to  $N_4$  and  $N_6$  clusters leads to significant changes in their aromatic character. While neutral  $N_4$  and  $N_6$  clusters exhibit minimal to no aromaticity, their anionic counterparts display enhanced aromatic features, particularly in the  $\sigma$ -electron framework. These findings underscore the importance of electron count and delocalization in determining the aromatic nature of nitrogen clusters.

#### **Level of theory: B3LYP/6-311+G(d)**

Optimized geometry of  $N_4^{2-}$  ( $C_s$ ):

|   |             |             |             |
|---|-------------|-------------|-------------|
| N | 0.63995900  | 0.74055400  | 0.00002400  |
| N | 0.74017800  | -0.63943900 | -0.00002400 |
| N | -0.63905200 | -0.74054600 | 0.00002400  |
| N | -0.74108500 | 0.63943100  | -0.00002400 |

Optimized geometry of  $N_4^{2-}$  ( $D_{4h}$ ):

|   |             |             |            |
|---|-------------|-------------|------------|
| N | 0.00000000  | 0.97875800  | 0.00000000 |
| N | 0.97875800  | 0.00000000  | 0.00000000 |
| N | 0.00000000  | -0.97875800 | 0.00000000 |
| N | -0.97875800 | 0.00000000  | 0.00000000 |

Optimized geometry of  $N_6^{4-}$  ( $C_{2v}$ ):

|   |             |             |             |
|---|-------------|-------------|-------------|
| N | 1.14776400  | 0.65551300  | -0.19815400 |
| N | 0.00000000  | 1.25015500  | 0.39630800  |
| N | -1.14776400 | 0.65551300  | -0.19815400 |
| N | -1.14776400 | -0.65551300 | -0.19815400 |
| N | 0.00000000  | -1.25015500 | 0.39630800  |
| N | 1.14776400  | -0.65551300 | -0.19815400 |

Optimized geometry of  $N_6^{4-}$  ( $D_{6h}$ ):

|   |             |             |            |
|---|-------------|-------------|------------|
| N | 0.00000000  | 1.42727800  | 0.00000000 |
| N | 1.23605900  | 0.71363900  | 0.00000000 |
| N | 1.23605900  | -0.71363900 | 0.00000000 |
| N | 0.00000000  | -1.42727800 | 0.00000000 |
| N | -1.23605900 | -0.71363900 | 0.00000000 |
| N | -1.23605900 | 0.71363900  | 0.00000000 |
